# Supplementary material for: Fundamental understanding of the size and surface modification effects on r1, the relaxivity of Prussian blue nanocube@m-SiO2: a novel targeted chemo-photodynamic theranostic agent to treat colon cancer
Source: Royal Society of Chemistry journal article supplement (doi:10.1039/d2ra03995h), 2022-01-01
Supplement: d2ra03995h1.pdf [file d2ra03995h1.pdf]

## Electronic Supplementary Information

### **Fundamental understanding of size and surface modification effects on $r_1$ relaxivity of Prussian blue nanocube@m-SiO<sub>2</sub>: a novel targeted chemo-photodynamic theranostic agent to treat colon cancer**

Panchanan Sahoo<sup>†,‡</sup>, Sudip Kundu<sup>†</sup>, Shubham Roy<sup>⊥</sup>, S. K Sharma<sup>⊥</sup> Jiten Ghosh<sup>§</sup>, Snehasis Mishra<sup>†</sup>, Abhishek Mukherjee<sup>#,‡</sup>, Chandan Kumar Ghosh<sup>\*,†</sup>

<sup>†</sup>School of Materials Science and Nanotechnology, Jadavpur University, Kolkata-700032, India

<sup>‡</sup>Agricultural and Ecological Research Unit, Biological Science Division, Indian Statistical Institute, Giridih, Jharkhand, India

<sup>⊥</sup>Department of Physics, Jadavpur University, Kolkata-700032

<sup>⊥</sup>Eko X-Ray & Imaging Institute, 54, Jawaharlal Nehru Road, Kolkata-700071, India

<sup>§</sup>XRD and SEM Units, Materials Characterization and Instrumentation Division, CSIR-Central Glass and Ceramic Research Institute, India

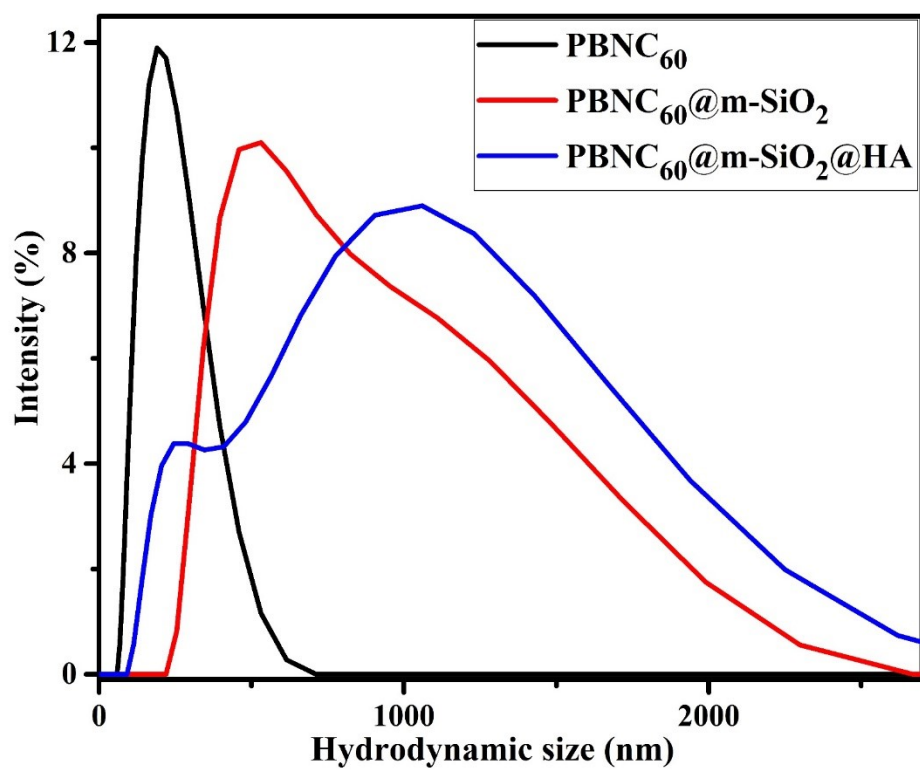

**Figure S1:** Variation of particle sizes of PBNC<sub>60</sub>, PBNC<sub>60</sub>@m-SiO<sub>2</sub>, PBNC<sub>60</sub>@m-SiO<sub>2</sub>@HA in aqueous medium through DLS.

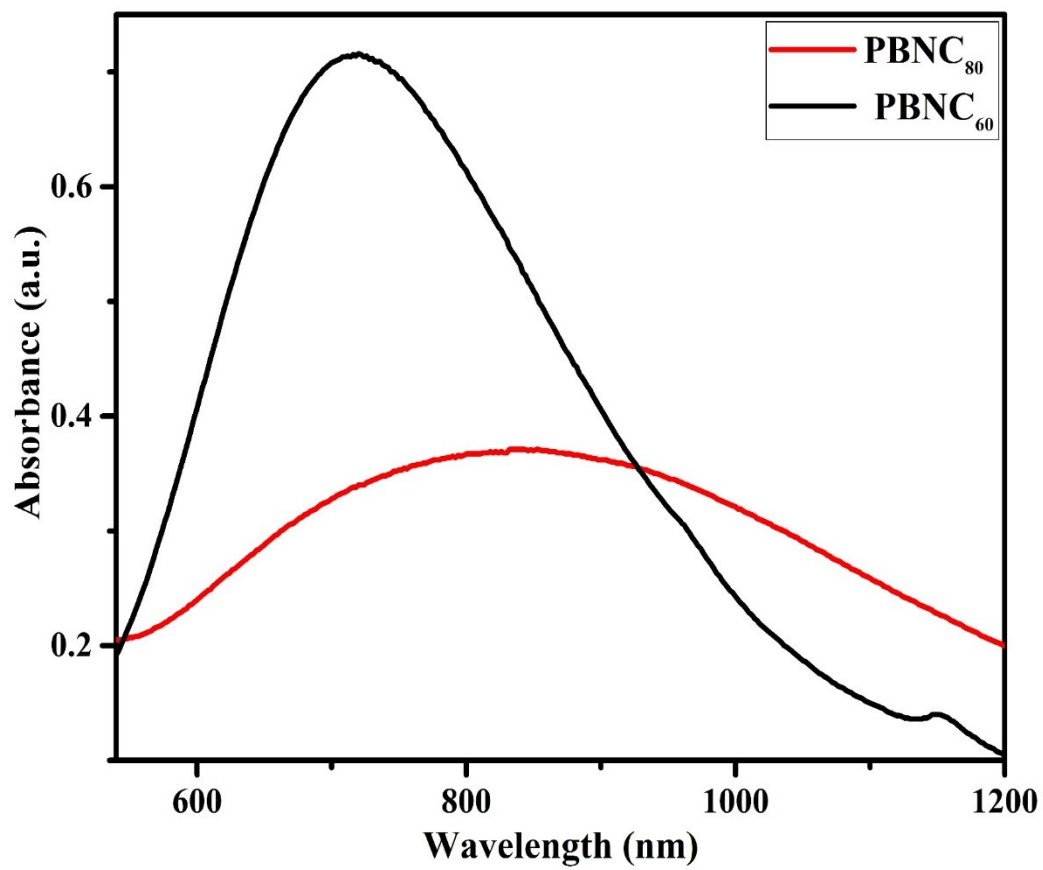

**Figure S2:** Red shifted absorption peak due to increase in particle size of pristine PBNC from optical measurement.

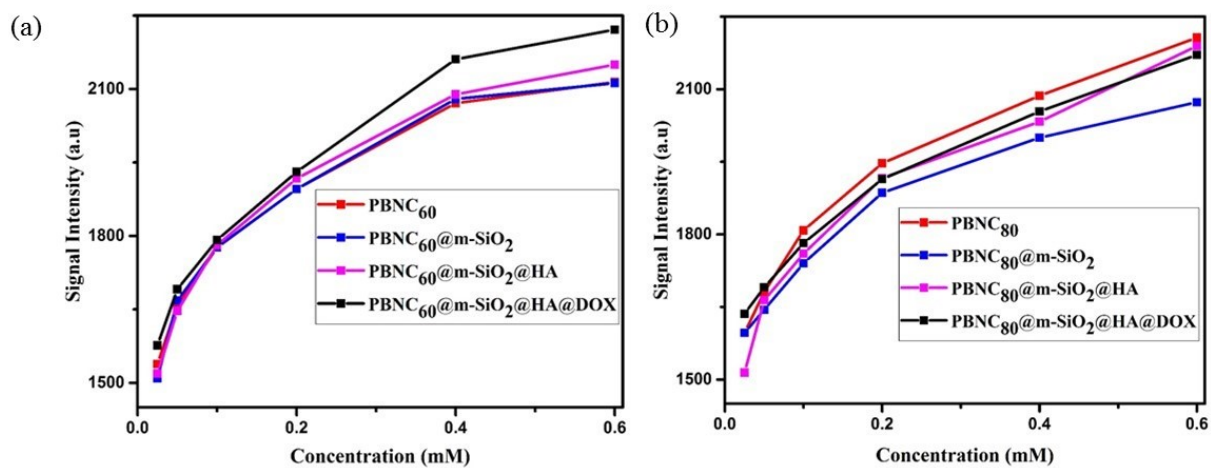

**Figure S3:** Determination of  $r_1$  relaxivity value of (a) PBNC<sub>60</sub> and (b) PBNC<sub>80</sub> after each step of modification in PBS.

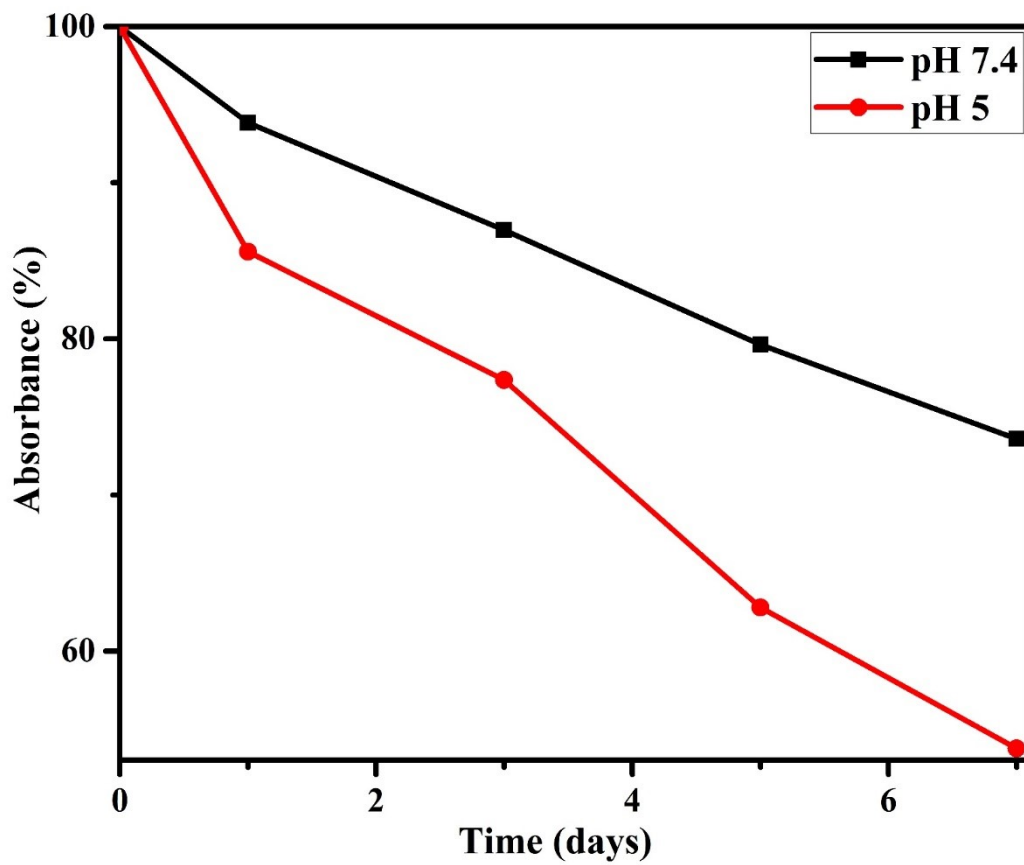

**Figure S4:** Time dependent stability checking of PBNC<sub>60</sub>@m-SiO<sub>2</sub>@HA in pH 5 and 7.4.

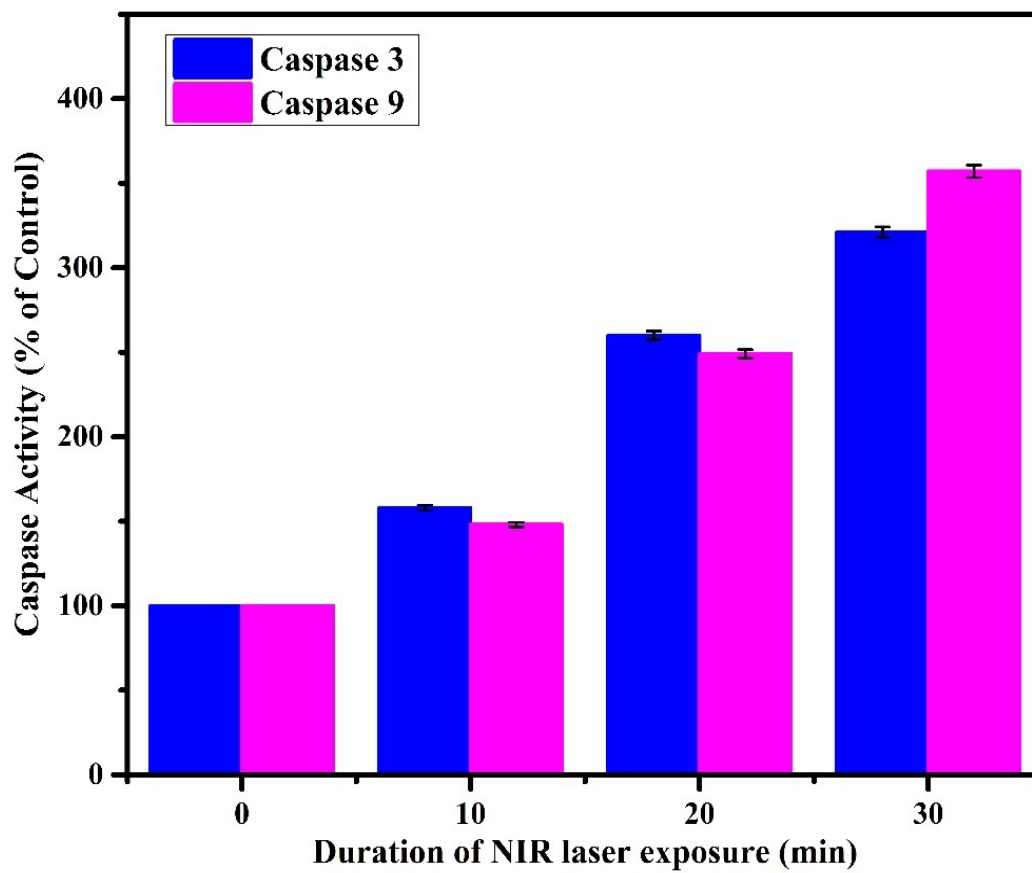

**Figure S5:** Expression of caspase 3 and caspase 9 in PBNC<sub>60</sub>@mSiO<sub>2</sub>@HA@DOX (21 µg/mL) treated NIR irradiated (10, 20 and 30 min) HCT 116 cell line.

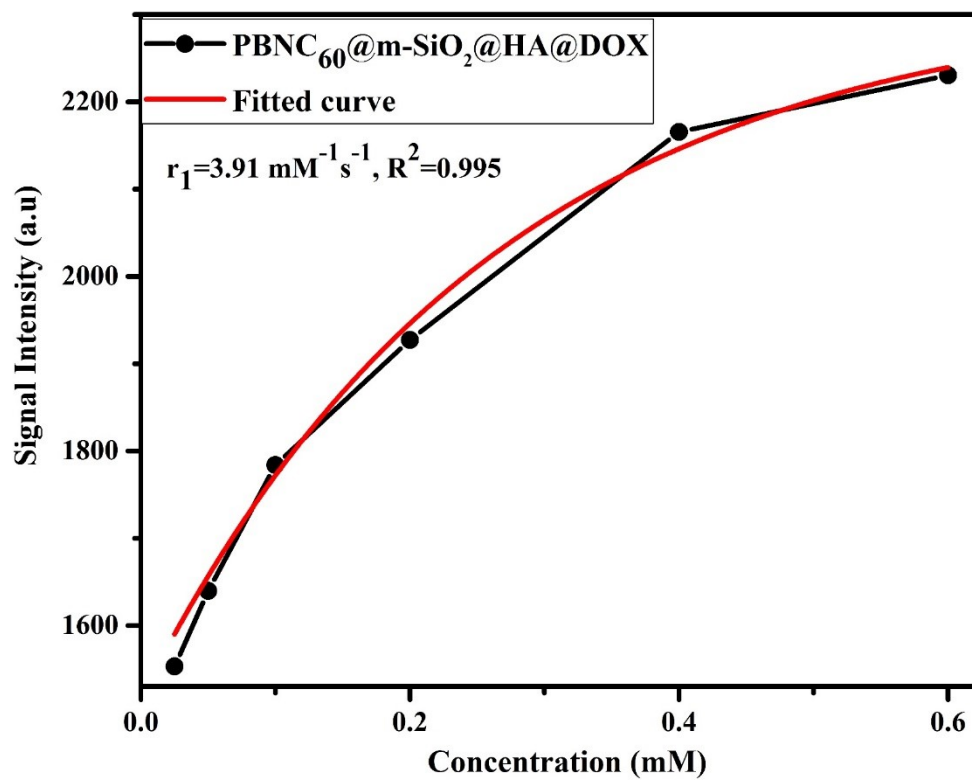

**Figure S6:** Plot for *in vitro*  $r_1$  relaxivity measurement in HCT 116 cell line after incubation with PBNC<sub>60</sub>@mSiO<sub>2</sub>@HA@DOX for 24 h.
